# Supplementary material for: Self-powered, high response and fast response speed metal–insulator–semiconductor structured photodetector based on 2D MoS2
Source: RSC Adv. 2018 Aug 6;8(49):28041–7. doi: 10.1039/c8ra05511d (PMC9084249; doi:10.1039/c8ra05511d)
Supplement: RA-008-C8RA05511D-s001 [file RA-008-C8RA05511D-s001.pdf]

## **Self-powered, High Response and Fast Response Speed Metal-Insulator-Semiconductor Structured Photodetector based on 2D MoS<sub>2</sub>**

Xinxin Liu<sup>a</sup>, Feng Li<sup>a</sup>, Minxuan Xu<sup>a</sup>, Junjie Qi<sup>\*a</sup>

<sup>†</sup>State Key Laboratory for Advanced Metals and Materials, School of Materials Science and Engineering, University of Science and Technology Beijing, Beijing100083, People's Republic of China.

<sup>†</sup>These authors made equal contributions to this work.

Corresponding Author

\*E-mail: junjieqi@ustb.edu.cn.

# **Raman measurement for as-grown MoS<sub>2</sub> and atomic force microscopy experiment for the electrodes.**

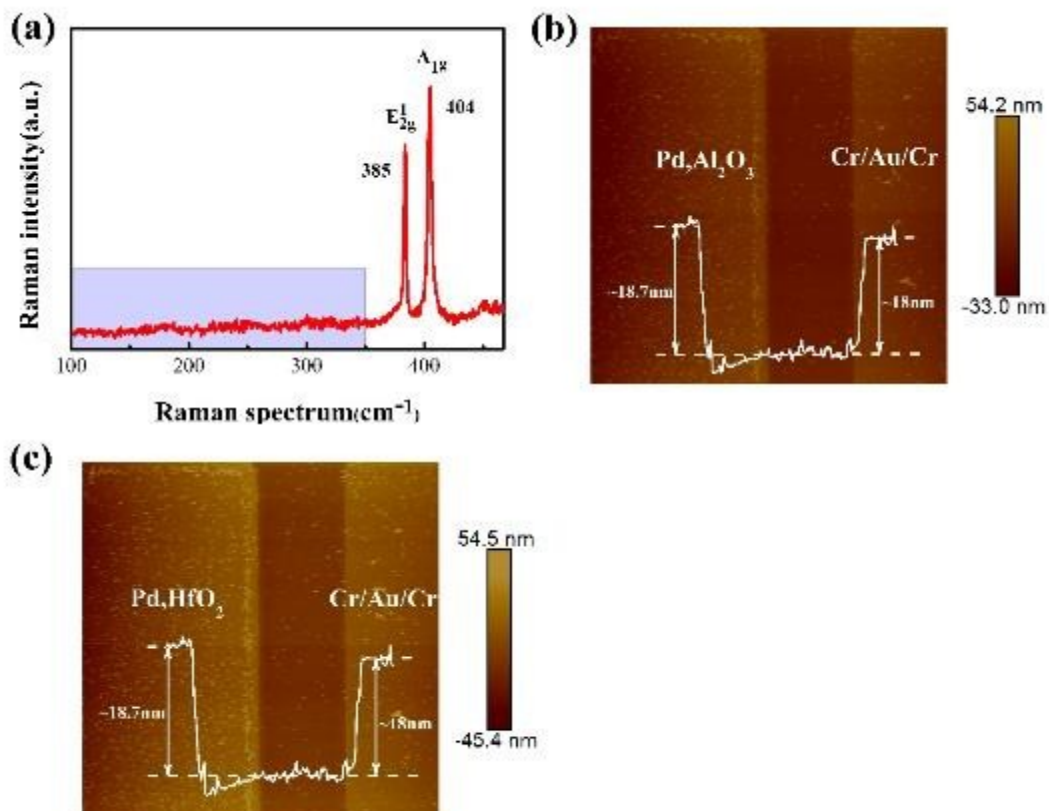

**Fig. S1.** The Raman spectrum of the MoS<sub>2</sub> and atomic force microscopy image of the electrodes. (a) The Raman spectrum of monolayer 2H phase MoS<sub>2</sub>. (b), (c) Atomic force microscopy image of the electrodes of MIS structured Pd/Al<sub>2</sub>O<sub>3</sub>/MoS<sub>2</sub> photodetector and MIS structured Pd/HfO<sub>2</sub>/MoS<sub>2</sub> photodetector. It shows that the Pd/HfO<sub>2</sub> and Cr/Au/Cr are ~18.7 nm, ~18 nm thick, respectively.

## MIS structured photodetectors preparation

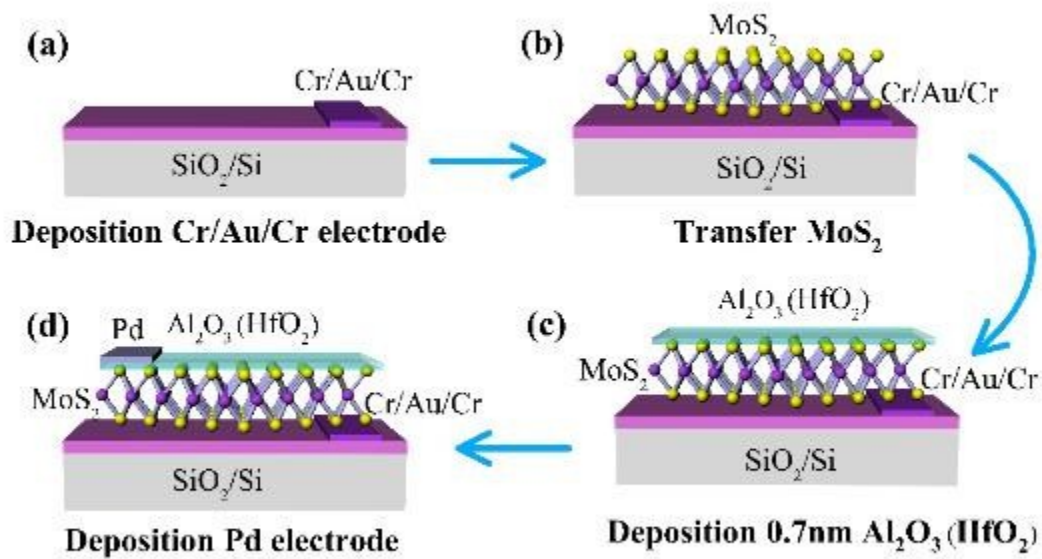

**Fig. S2.** The schematic diagrams of fabricating progress of the MIS structured photodetectors.

## Electrical measurement

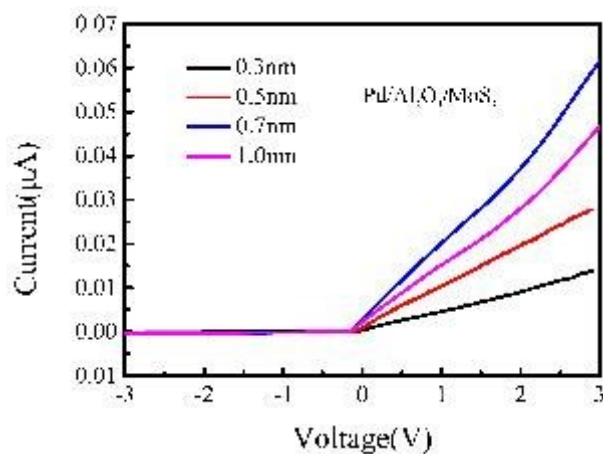

**Figure S3.** Different thickness of insulator film on current-voltage curves of the device Pd/Al<sub>2</sub>O<sub>3</sub>/MoS<sub>2</sub> MIS structured photodetector. From picture, when the thickness is 0.7 nm, the photocurrent is the highest. So, we choose 0.7 nm insulator film.

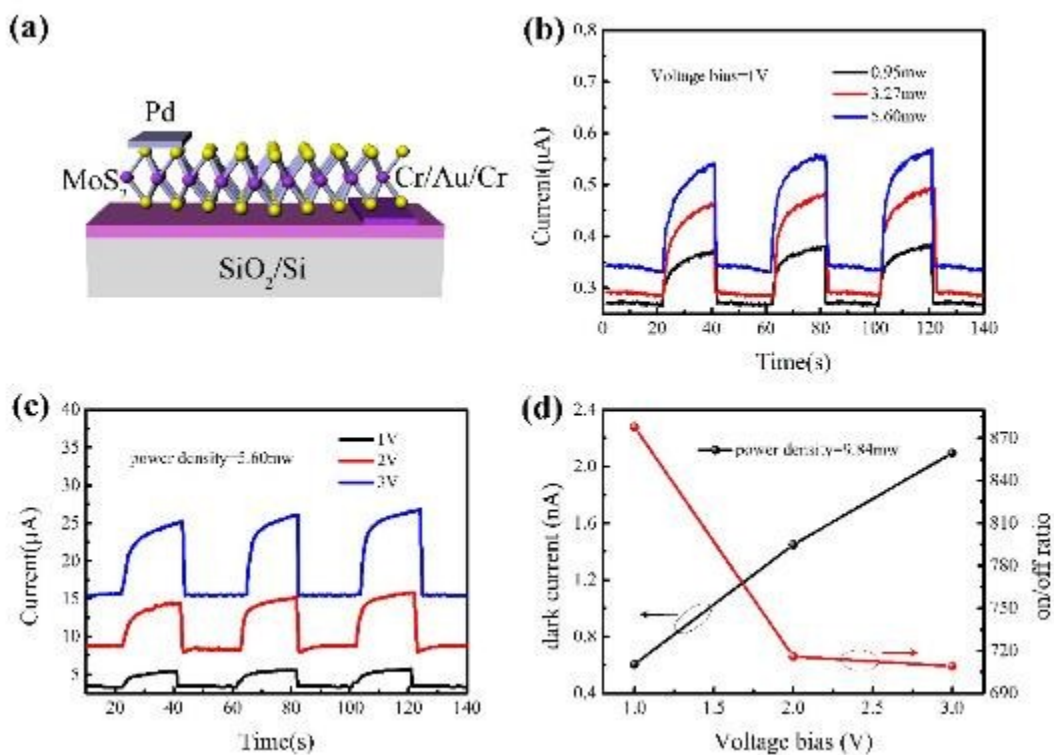

**Fig. S4.** Schematic structure and optoelectronic characteristic of the MS structured Pd/MoS<sub>2</sub>/Cr photodetector. (a) Schematic device structure of the MS structured Pd/MoS<sub>2</sub>/Cr photodetector

fabricated on a 300 nm SiO<sub>2</sub>/Si substrate. (b) Time-dependent photocurrent response of the MS structured Pd/MoS<sub>2</sub>/Cr photodetector under switched-on/off light irradiation with different power at bias voltages of 1V. (c) Time-dependent photocurrent response of the MS structured Pd/MoS<sub>2</sub>/Cr photodetector under switched-on/off light irradiation at different bias voltages with 5.60 mw power intensity. (d) Voltage bias-dependent peculiarity of dark current and on/off ratio for this structure with 9.84 mw power intensity, which voltage bias increases, the dark current increase gradually, as well as the responsivity reduce accordingly.

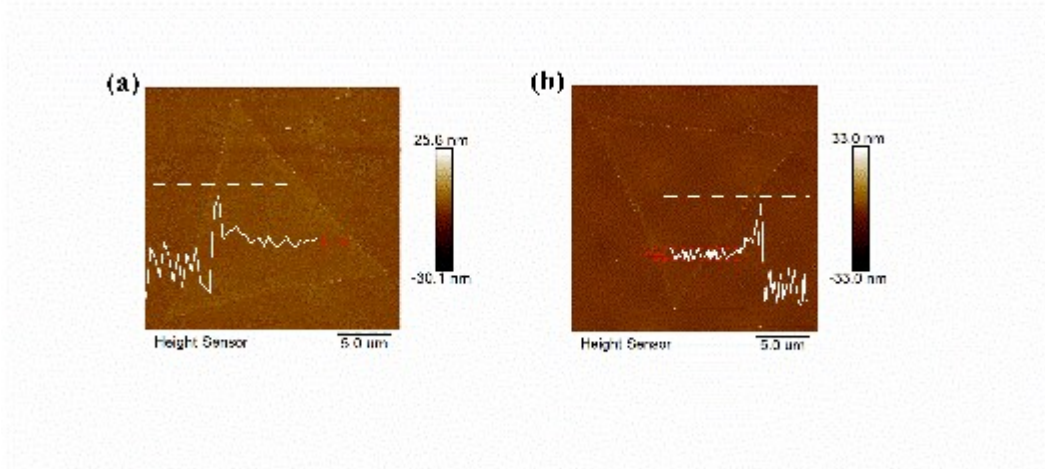

**Fig. S5.** (a), (b) Atomic force microscopy image of the Al<sub>2</sub>O<sub>3</sub> thin film and HfO<sub>2</sub> thin film on the monolayer MoS<sub>2</sub>, respectively.
